# Supplementary material for: Anti-counterfeiting SERS security labels derived from silver nanoparticles and aryl diazonium salts
Source: Royal Society of Chemistry journal article supplement (doi:10.1039/d2na00572g), 2022-01-01
Supplement: d2na00572g1.pdf [file d2na00572g1.pdf]

## Supporting Information

### **Anti-Counterfeiting SERS Security Labels Derived from Silver Nanoparticles and Aryl Diazonium Salts**

Da Li,<sup>a</sup> Julien Brunie,<sup>b</sup> Fan Sun,<sup>c</sup> Philippe Nizard,<sup>a</sup> Delphine Onidas,<sup>a</sup> Aazdine Lamouri,<sup>b</sup> Vincent Noël,<sup>b</sup> Claire Mangeney,<sup>a</sup> Giorgio Mattana,<sup>\*b</sup> Yun Luo<sup>\*a</sup>

<sup>a</sup> Université Paris Cité, CNRS, Laboratoire de Chimie et de Biochimie Pharmacologiques et Toxicologiques, F-75006 Paris, France

<sup>b</sup> University Paris Cité, ITODYS, UMR 7086, 75013 Paris (France)

<sup>c</sup> PSL Université, Chimie Paris Tech, IRCP, CNRS UMR 8247, 75005 Paris (France)

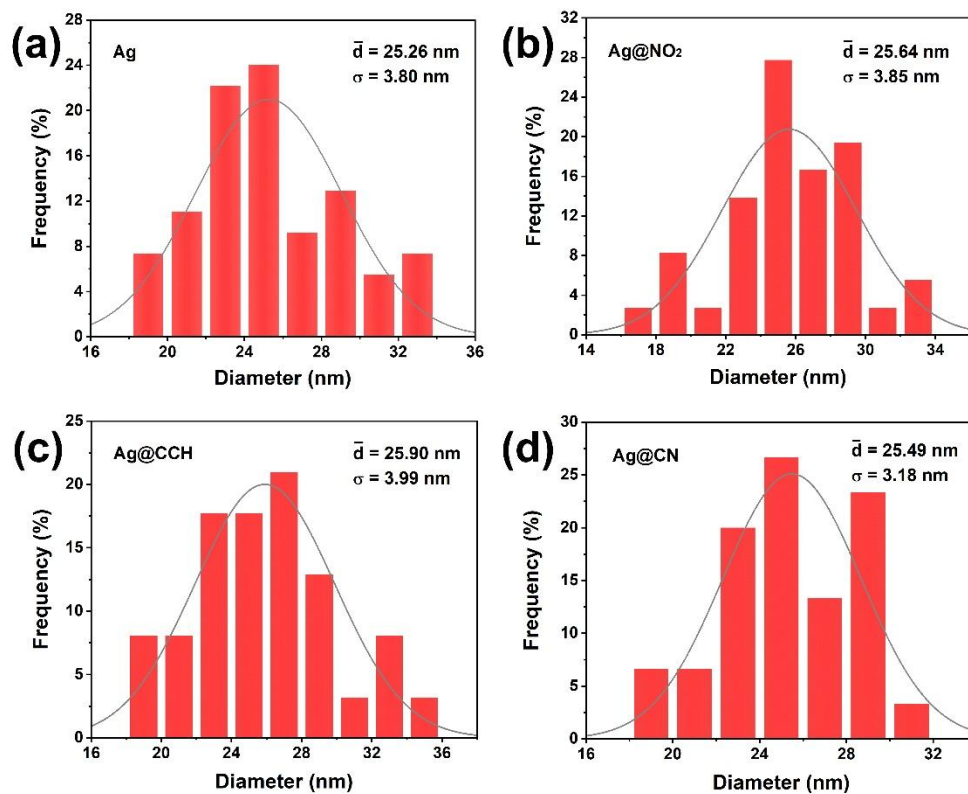

**Fig. S1** Size distribution histograms measured from SEM images and associated distribution curves of (a) pristine Ag NPs, (b) Ag@NO<sub>2</sub>, (c) Ag@CCH and (d) Ag@CN NPs.

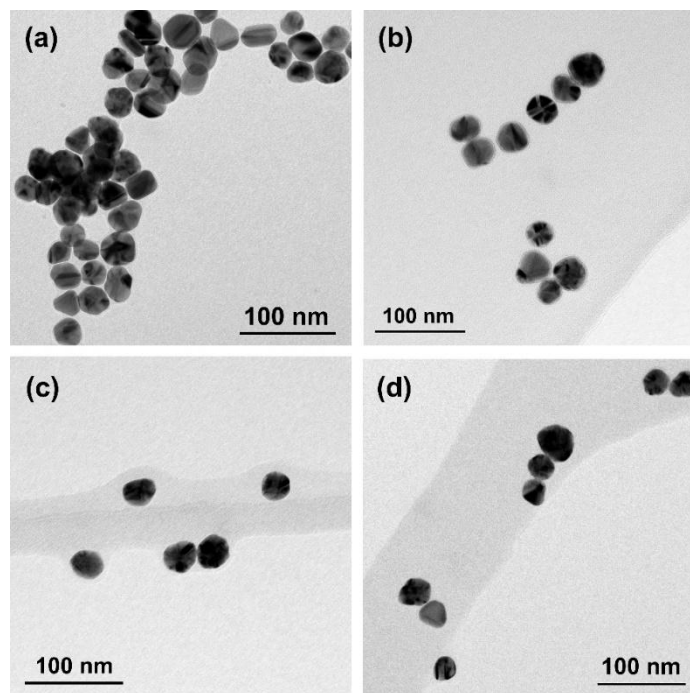

**Fig. S2** TEM images of (a) pristine Ag NPs, (b) Ag@NO<sub>2</sub>, (c) Ag@CCH and (d) Ag@CN NPs.

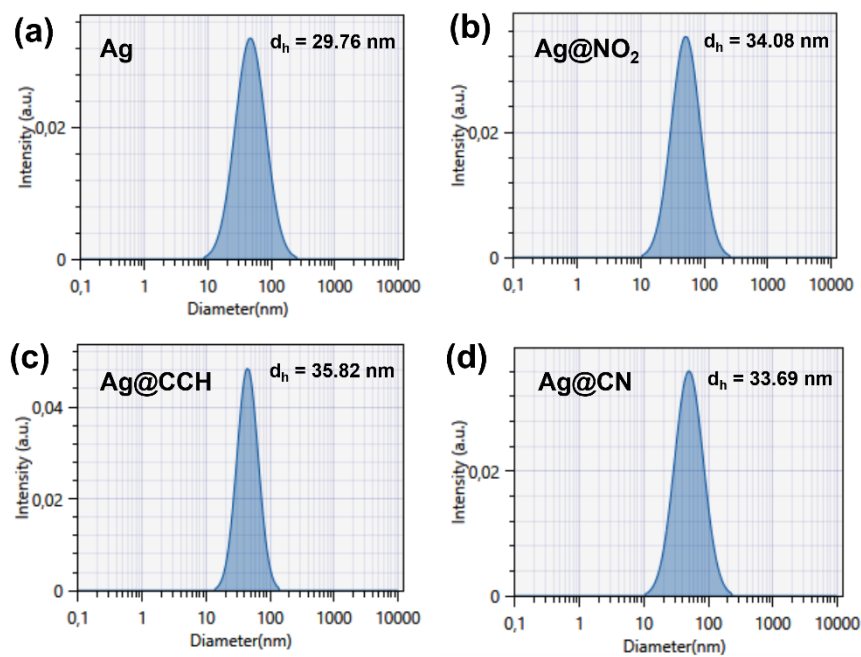

**Fig. S3** The hydrodynamic size ( $d_h$ ) from DLS measurements for (a) Ag, (b) Ag@NO<sub>2</sub>, (c) Ag@CCH and (d) Ag@CN NPs.

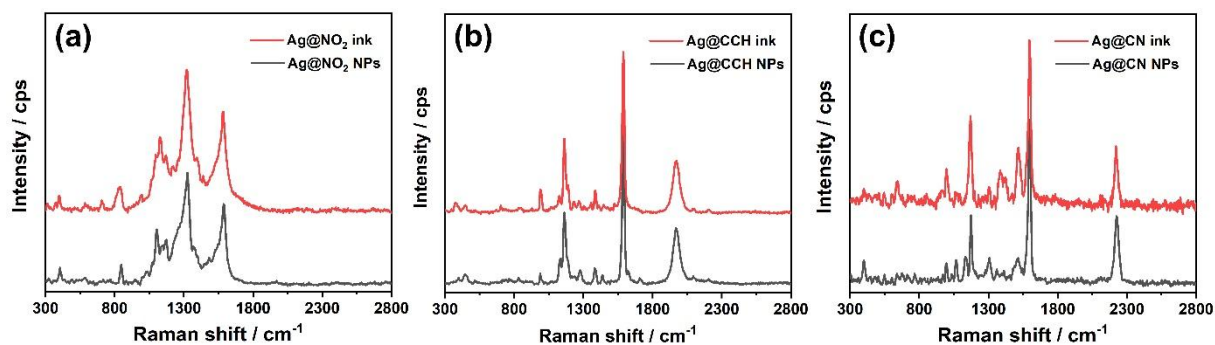

**Fig. S4** SERS signals of (a) Ag@NO<sub>2</sub>, (b) Ag@CCH and (c) Ag@CN before (black curves) and after dispersion in the inks (red curves).

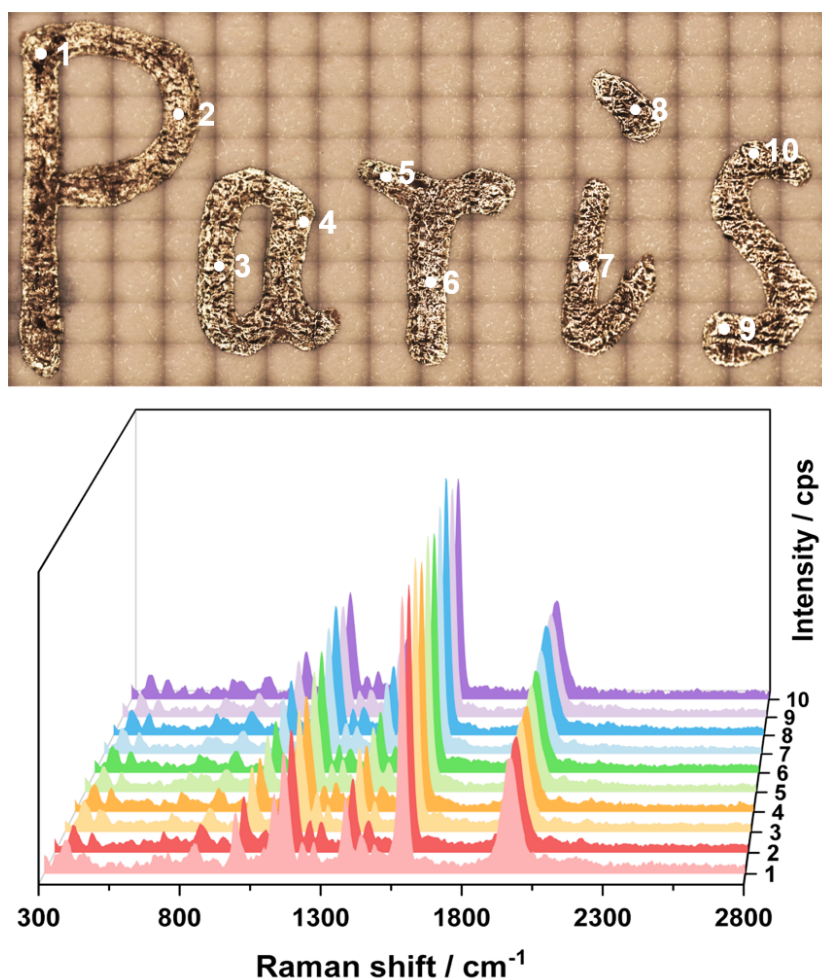

**Fig. S5** SERS spectra collected from different spots of the handwritten word "Paris" (using Ag@CCH ink).

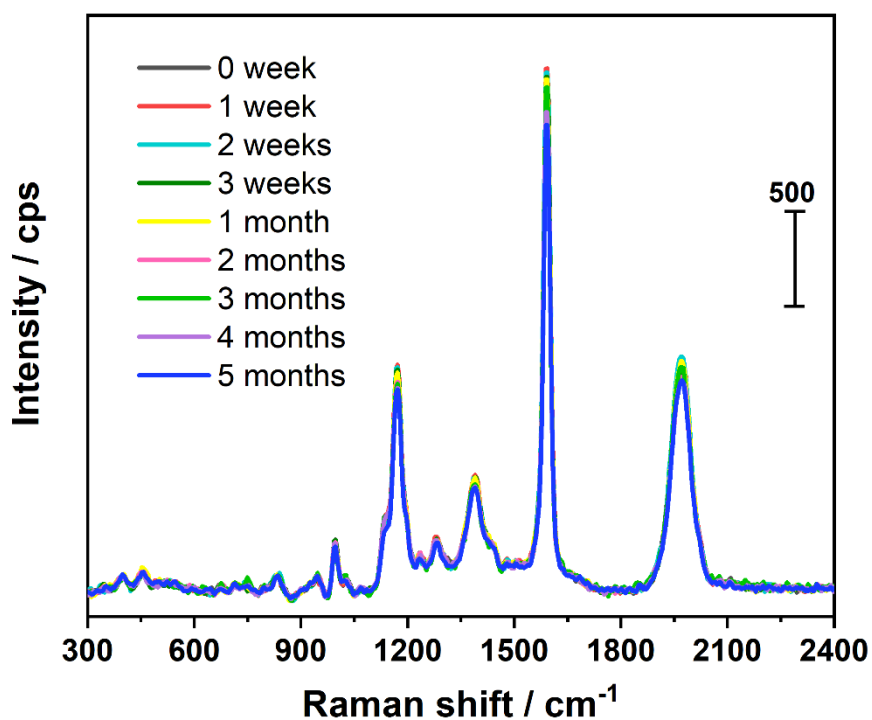

Fig. S6 Stability over time of Ag@CCH ink within 5 months.

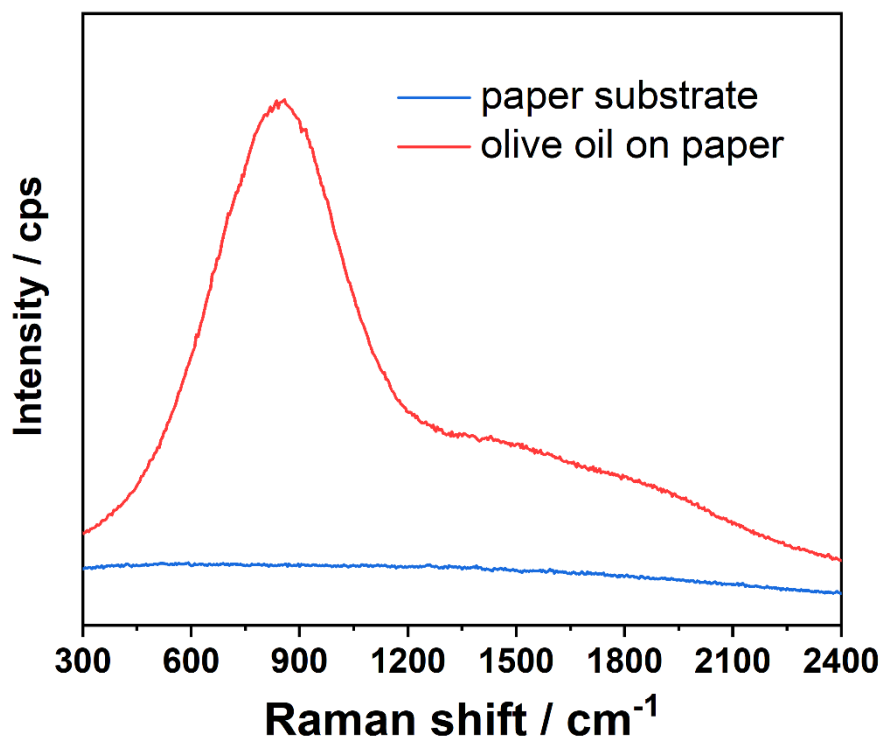

Fig. S7 Raman spectra of olive oil and the paper substrate under excitation of 638 nm laser.

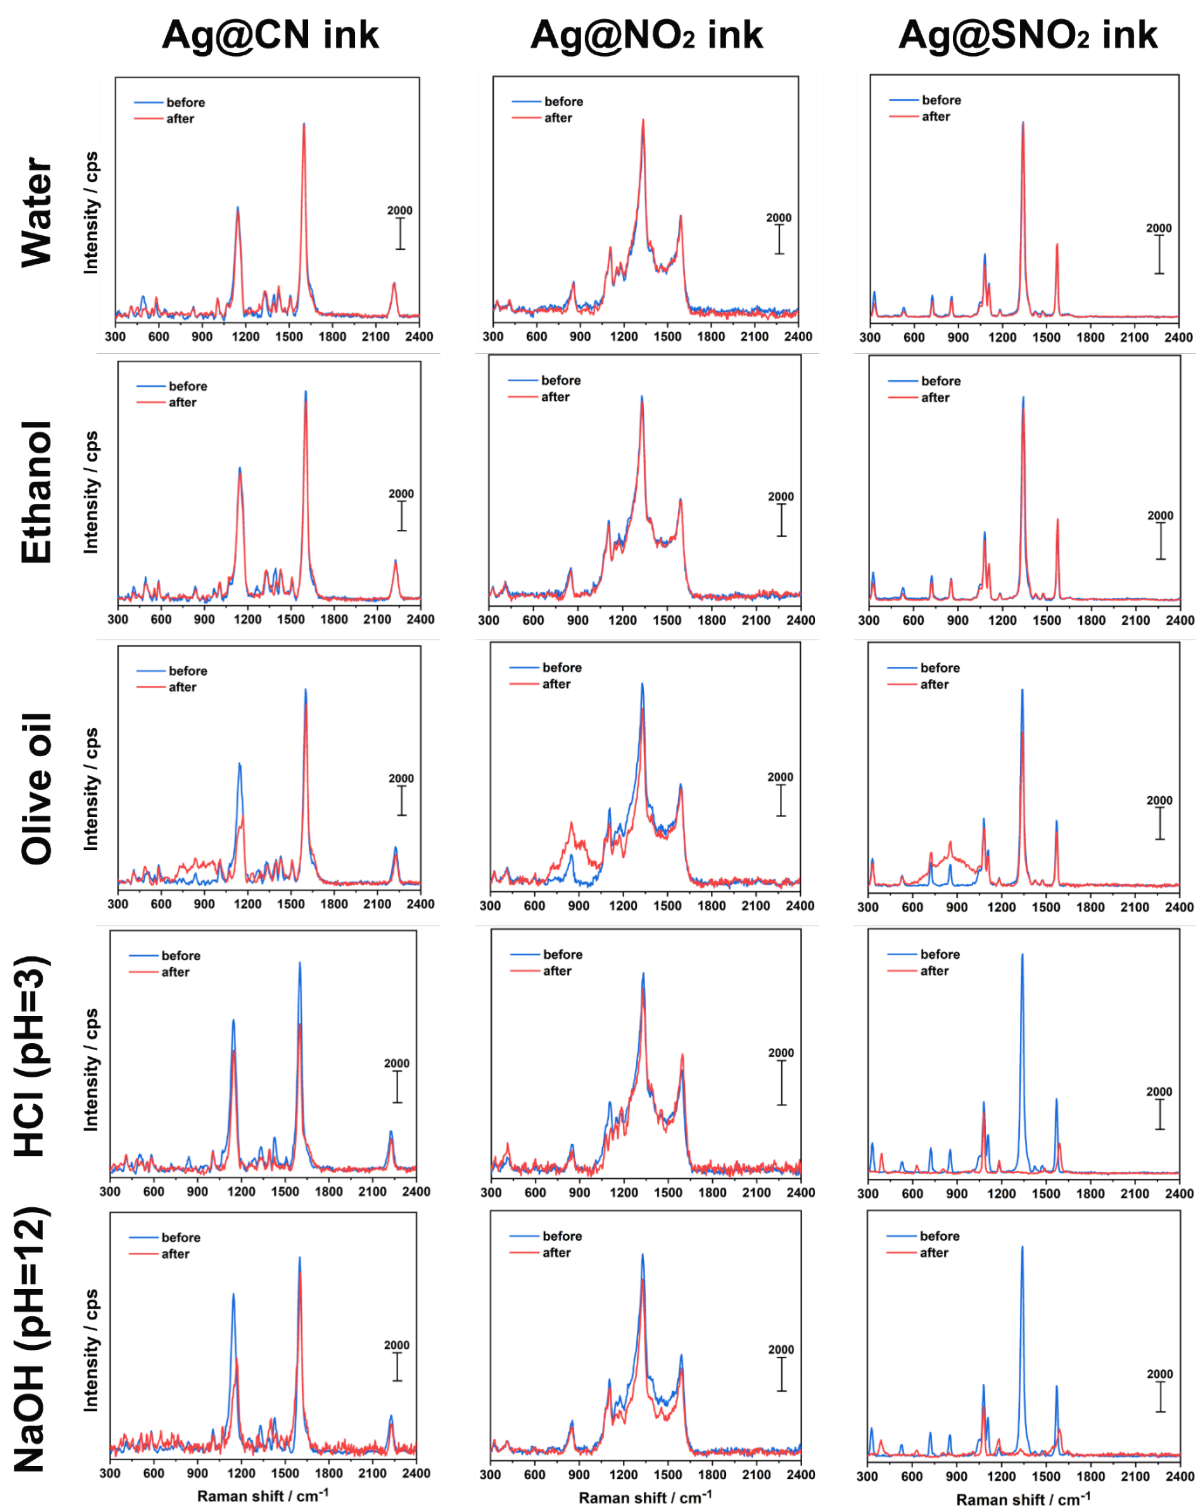

**Fig. S8** Investigation of the stability of Ag@CN, Ag@NO<sub>2</sub> and Ag@SNO<sub>2</sub> ink in different medium. The testing method is same to that of Ag@CCH ink illustrated in maintext.

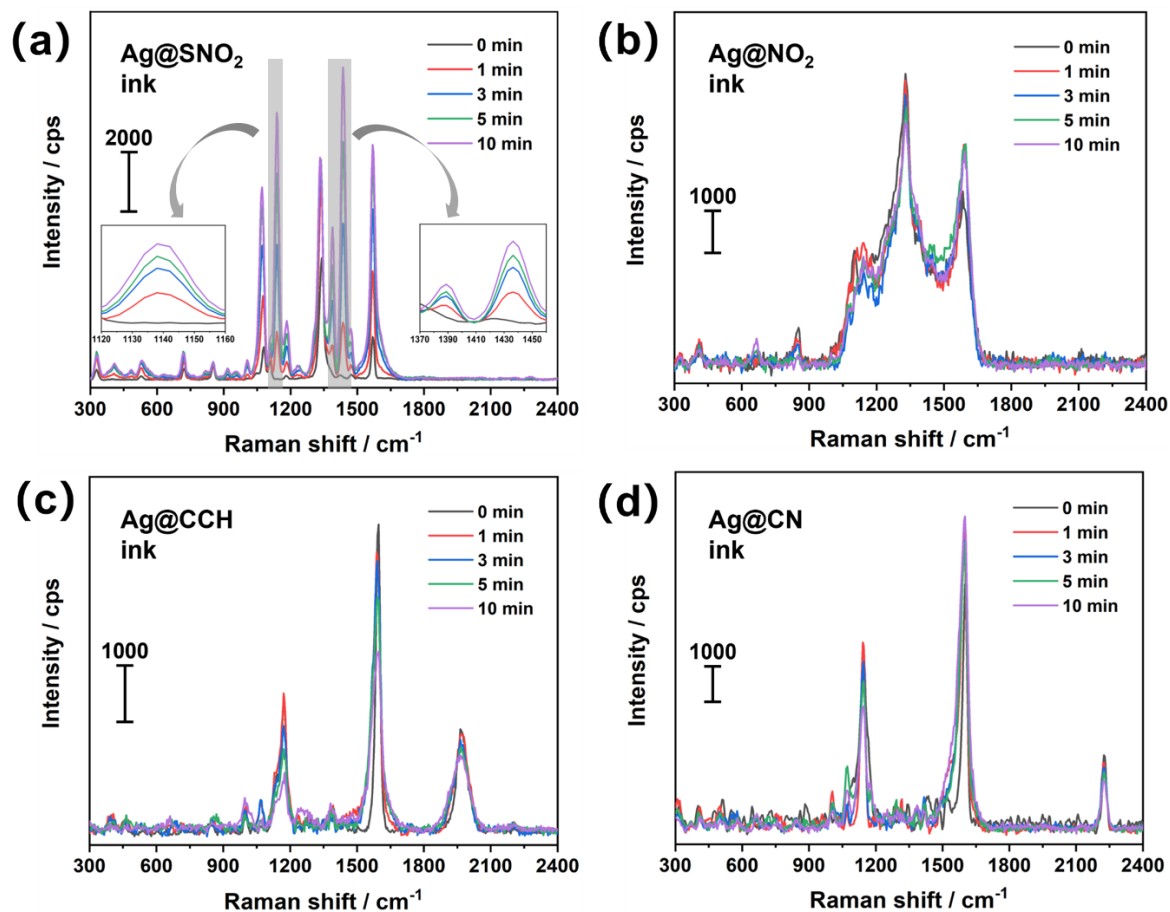

**Figure S9.** SERS spectra of (a) Ag@SNO<sub>2</sub>, (b) Ag@NO<sub>2</sub>, (c) Ag@CCH and (d) Ag@CN inks under laser irradiation for 0, 1, 3, 5 and 10 minutes, using 638 nm laser (10 mW) with objective 10x. The insets of Fig. (a) display a zoom of the time evolution of the peaks located in the shaded regions.
